# Supplementary material
Source: publisher figshare collection journal article supplement (https://acs.figshare.com/ndownloader/files/4581388)
Supplement: Supplementary file 1 [file 4581388]

data_a8481
 
_audit_creation_method            SHELXL-97
_chemical_name_systematic
;
 ?
;
_chemical_name_common             ?
_chemical_melting_point           ?
_chemical_formula_moiety          'C20 H27 Cl2 N5 Ni O2'
_chemical_formula_sum             'C20 H27 Cl2 N5 Ni O2'
_chemical_formula_weight          499.08
 
loop_
 _atom_type_symbol
 _atom_type_description
 _atom_type_scat_dispersion_real
 _atom_type_scat_dispersion_imag
 _atom_type_scat_source
 'C'  'C'   0.0033   0.0016
 'International Tables Vol C Tables 4.2.6.8 and 6.1.1.4'
 'H'  'H'   0.0000   0.0000
 'International Tables Vol C Tables 4.2.6.8 and 6.1.1.4'
 'N'  'N'   0.0061   0.0033
 'International Tables Vol C Tables 4.2.6.8 and 6.1.1.4'
 'O'  'O'   0.0106   0.0060
 'International Tables Vol C Tables 4.2.6.8 and 6.1.1.4'
 'Cl'  'Cl'   0.1484   0.1585
 'International Tables Vol C Tables 4.2.6.8 and 6.1.1.4'
 'Ni'  'Ni'   0.3393   1.1124
 'International Tables Vol C Tables 4.2.6.8 and 6.1.1.4'
 
_symmetry_cell_setting            monoclinic
_symmetry_space_group_name_H-M    'P 2/c'
 
loop_
 _symmetry_equiv_pos_as_xyz
 'x, y, z'
 '-x, y, -z+1/2'
 '-x, -y, -z'
 'x, -y, z-1/2'
 
_cell_length_a                    13.5208(19)
_cell_length_b                    8.1518(10)
_cell_length_c                    26.366(4)
_cell_angle_alpha                 90.00
_cell_angle_beta                  104.592(3)
_cell_angle_gamma                 90.00
_cell_volume                      2812.3(6)
_cell_formula_units_Z             4
_cell_measurement_temperature     200(2)
_cell_measurement_reflns_used     0
_cell_measurement_theta_min       0
_cell_measurement_theta_max       0
 
_exptl_crystal_description        prism
_exptl_crystal_colour             green
_exptl_crystal_size_max           0.36
_exptl_crystal_size_mid           0.17
_exptl_crystal_size_min           0.04
_exptl_crystal_density_meas       ?
_exptl_crystal_density_diffrn     1.179
_exptl_crystal_density_method     'not measured'
_exptl_crystal_F_000              1040
_exptl_absorpt_coefficient_mu     0.901
_exptl_absorpt_correction_type    multi-scan
_exptl_absorpt_correction_T_min   0.7374
_exptl_absorpt_correction_T_max   0.9648
_exptl_absorpt_process_details    ?
 
_exptl_special_details
;
 ?
;
 
_diffrn_ambient_temperature       200(2)
_diffrn_radiation_wavelength      0.71073
_diffrn_radiation_type            MoK\a
_diffrn_radiation_source          'fine-focus sealed tube'
_diffrn_radiation_monochromator   graphite
_diffrn_measurement_device_type   ?
_diffrn_measurement_method        ?
_diffrn_detector_area_resol_mean  ?
_diffrn_standards_number          ?
_diffrn_standards_interval_count  ?
_diffrn_standards_interval_time   ?
_diffrn_standards_decay_%         ?
_diffrn_reflns_number             17816
_diffrn_reflns_av_R_equivalents   0.0534
_diffrn_reflns_av_sigmaI/netI     0.0593
_diffrn_reflns_limit_h_min        -15
_diffrn_reflns_limit_h_max        16
_diffrn_reflns_limit_k_min        -7
_diffrn_reflns_limit_k_max        9
_diffrn_reflns_limit_l_min        -31
_diffrn_reflns_limit_l_max        30
_diffrn_reflns_theta_min          1.56
_diffrn_reflns_theta_max          25.02
_reflns_number_total              4917
_reflns_number_gt                 3793
_reflns_threshold_expression      >2sigma(I)
 
_computing_data_collection        ?
_computing_cell_refinement        ?
_computing_data_reduction         ?
_computing_structure_solution     'SHELXS-86 (Sheldrick, 1986)'
_computing_structure_refinement   'SHELXL-97 (Sheldrick, 1997)'
_computing_molecular_graphics     'Ortep-3 for Windows (Farrugia, 1997)'
_computing_publication_material   'WinGX publication routines (Farrugia, 1999)'
 
_refine_special_details
;
 Refinement of F^2^ against ALL reflections.  The weighted R-factor wR and
 goodness of fit S are based on F^2^, conventional R-factors R are based
 on F, with F set to zero for negative F^2^. The threshold expression of
 F^2^ > 2sigma(F^2^) is used only for calculating R-factors(gt) etc. and is
 not relevant to the choice of reflections for refinement.  R-factors based
 on F^2^ are statistically about twice as large as those based on F, and R-
 factors based on ALL data will be even larger.
;
 
_refine_ls_structure_factor_coef  Fsqd
_refine_ls_matrix_type            full
_refine_ls_weighting_scheme       calc
_refine_ls_weighting_details
 'calc w=1/[\s^2^(Fo^2^)+(0.1965P)^2^+10.6887P] where P=(Fo^2^+2Fc^2^)/3'
_atom_sites_solution_primary      direct
_atom_sites_solution_secondary    difmap
_atom_sites_solution_hydrogens    geom
_refine_ls_hydrogen_treatment     constr
_refine_ls_extinction_method      none
_refine_ls_extinction_coef        ?
_refine_ls_number_reflns          4917
_refine_ls_number_parameters      266
_refine_ls_number_restraints      0
_refine_ls_R_factor_all           0.1178
_refine_ls_R_factor_gt            0.0978
_refine_ls_wR_factor_ref          0.2864
_refine_ls_wR_factor_gt           0.2603
_refine_ls_goodness_of_fit_ref    1.028
_refine_ls_restrained_S_all       1.028
_refine_ls_shift/su_max           0.000
_refine_ls_shift/su_mean          0.000
 
loop_
 _atom_site_label
 _atom_site_type_symbol
 _atom_site_fract_x
 _atom_site_fract_y
 _atom_site_fract_z
 _atom_site_U_iso_or_equiv
 _atom_site_adp_type
 _atom_site_occupancy
 _atom_site_symmetry_multiplicity
 _atom_site_calc_flag
 _atom_site_refinement_flags
 _atom_site_disorder_assembly
 _atom_site_disorder_group
C1 C 0.9247(6) 0.1640(10) 0.4231(3) 0.0265(17) Uani 1 1 d . . .
C2 C 0.9663(7) 0.3036(11) 0.4507(3) 0.038(2) Uani 1 1 d . . .
H2 H 0.9268 0.4003 0.4501 0.046 Uiso 1 1 calc R . .
C3 C 1.0659(8) 0.2965(13) 0.4786(4) 0.047(2) Uani 1 1 d . . .
H3 H 1.0956 0.3892 0.4986 0.056 Uiso 1 1 calc R . .
C4 C 1.1251(7) 0.1576(13) 0.4786(4) 0.044(2) Uani 1 1 d . . .
H4 H 1.1952 0.1598 0.4971 0.053 Uiso 1 1 calc R . .
C5 C 1.0852(7) 0.0166(12) 0.4526(4) 0.042(2) Uani 1 1 d . . .
H5 H 1.1248 -0.0803 0.4539 0.050 Uiso 1 1 calc R . .
C6 C 0.9831(7) 0.0247(10) 0.4242(3) 0.0322(19) Uani 1 1 d . . .
C7 C 0.9461(9) -0.2598(11) 0.3823(4) 0.044(2) Uani 1 1 d . . .
H7A H 1.0189 -0.2793 0.3981 0.066 Uiso 1 1 calc R . .
H7B H 0.9317 -0.2769 0.3443 0.066 Uiso 1 1 calc R . .
H7C H 0.9052 -0.3361 0.3972 0.066 Uiso 1 1 calc R . .
C8 C 0.8272(7) -0.0199(10) 0.3761(3) 0.0299(18) Uani 1 1 d . . .
C9 C 0.7354(7) -0.0952(11) 0.3408(3) 0.036(2) Uani 1 1 d . . .
H9A H 0.7404 -0.0873 0.3040 0.043 Uiso 1 1 calc R . .
H9B H 0.7319 -0.2127 0.3496 0.043 Uiso 1 1 calc R . .
C10 C 0.5922(7) -0.0985(11) 0.3819(3) 0.0327(19) Uani 1 1 d . . .
H10A H 0.5173 -0.0957 0.3670 0.039 Uiso 1 1 calc R . .
H10B H 0.6140 -0.2147 0.3856 0.039 Uiso 1 1 calc R . .
C11 C 0.6176(6) -0.0188(10) 0.4341(3) 0.0277(18) Uani 1 1 d . . .
C12 C 0.5817(7) -0.2550(11) 0.4870(4) 0.038(2) Uani 1 1 d . . .
H12A H 0.5832 -0.2729 0.5239 0.058 Uiso 1 1 calc R . .
H12B H 0.6299 -0.3299 0.4767 0.058 Uiso 1 1 calc R . .
H12C H 0.5126 -0.2759 0.4652 0.058 Uiso 1 1 calc R . .
C13 C 0.6413(7) 0.0324(11) 0.5185(3) 0.0323(19) Uani 1 1 d . . .
C14 C 0.6481(8) 0.0240(12) 0.5723(4) 0.043(2) Uani 1 1 d . . .
H14 H 0.6285 -0.0702 0.5886 0.052 Uiso 1 1 calc R . .
C15 C 0.6858(8) 0.1645(14) 0.5996(4) 0.048(3) Uani 1 1 d . . .
H15 H 0.6954 0.1653 0.6365 0.058 Uiso 1 1 calc R . .
C16 C 0.7110(8) 0.3079(13) 0.5749(3) 0.041(2) Uani 1 1 d . . .
H16 H 0.7322 0.4037 0.5953 0.049 Uiso 1 1 calc R . .
C17 C 0.7053(7) 0.3104(11) 0.5236(4) 0.037(2) Uani 1 1 d . . .
H17 H 0.7254 0.4045 0.5075 0.044 Uiso 1 1 calc R . .
C18 C 0.6683(6) 0.1674(11) 0.4939(3) 0.0307(19) Uani 1 1 d . . .
C19 C 0.4694(12) 0.407(2) 0.3729(5) 0.078(3) Uani 1 1 d . . .
H19A H 0.4003 0.4206 0.3503 0.117 Uiso 1 1 calc R . .
H19B H 0.5018 0.5142 0.3811 0.117 Uiso 1 1 calc R . .
H19C H 0.4657 0.3518 0.4054 0.117 Uiso 1 1 calc R . .
C20 C 0.7894(11) 0.365(2) 0.2928(5) 0.078(3) Uani 1 1 d . . .
H20A H 0.7813 0.3879 0.2555 0.117 Uiso 1 1 calc R . .
H20B H 0.8437 0.2834 0.3046 0.117 Uiso 1 1 calc R . .
H20C H 0.8075 0.4661 0.3130 0.117 Uiso 1 1 calc R . .
N1 N 0.8260(5) 0.1313(7) 0.3929(2) 0.0261(15) Uani 1 1 d . . .
N2 N 0.9206(5) -0.0933(8) 0.3927(3) 0.0301(16) Uani 1 1 d . . .
N3 N 0.6441(6) -0.0128(7) 0.3460(2) 0.0269(15) Uani 1 1 d . . .
H3' H 0.5987 -0.0064 0.3130 0.032 Uiso 1 1 calc R . .
N4 N 0.6104(5) -0.0861(9) 0.4796(3) 0.0309(16) Uani 1 1 d . . .
N5 N 0.6535(5) 0.1352(8) 0.4412(2) 0.0261(15) Uani 1 1 d . . .
O1 O 0.5294(5) 0.3075(8) 0.3460(2) 0.0415(16) Uani 1 1 d . . .
H1' H 0.4958 0.2705 0.3118 0.050 Uiso 1 1 calc R . .
O2 O 0.6981(6) 0.3037(8) 0.3003(2) 0.0405(16) Uani 1 1 d . . .
H2' H 0.6411 0.2921 0.2709 0.049 Uiso 1 1 calc R . .
Cl1 Cl 0.72629(17) 0.5051(2) 0.40712(8) 0.0320(5) Uani 1 1 d . . .
Ni1 Ni 0.68327(8) 0.23671(11) 0.37472(3) 0.0233(3) Uani 1 1 d . . .
Cl2 Cl 0.3824(2) 0.0563(3) 0.28642(8) 0.0489(7) Uani 1 1 d . . .
 
loop_
 _atom_site_aniso_label
 _atom_site_aniso_U_11
 _atom_site_aniso_U_22
 _atom_site_aniso_U_33
 _atom_site_aniso_U_23
 _atom_site_aniso_U_13
 _atom_site_aniso_U_12
C1 0.032(4) 0.031(4) 0.015(3) -0.005(3) 0.003(3) 0.006(4)
C2 0.041(5) 0.031(4) 0.039(5) -0.013(4) 0.001(4) 0.002(4)
C3 0.040(5) 0.043(6) 0.056(6) -0.019(5) 0.007(5) -0.007(5)
C4 0.028(5) 0.048(6) 0.049(5) -0.012(5) -0.006(4) 0.006(4)
C5 0.031(5) 0.033(5) 0.053(6) -0.009(4) -0.004(4) 0.008(4)
C6 0.029(4) 0.026(4) 0.041(4) -0.008(4) 0.007(4) 0.004(4)
C7 0.057(6) 0.020(4) 0.057(6) 0.010(4) 0.017(5) 0.009(4)
C8 0.035(5) 0.029(4) 0.024(4) 0.002(3) 0.004(3) -0.002(4)
C9 0.041(5) 0.038(5) 0.024(4) 0.002(4) -0.002(4) -0.005(4)
C10 0.028(4) 0.031(4) 0.034(4) 0.003(4) -0.002(3) 0.002(4)
C11 0.032(4) 0.025(4) 0.028(4) 0.001(3) 0.010(3) 0.010(4)
C12 0.040(5) 0.032(5) 0.047(5) 0.013(4) 0.018(4) 0.008(4)
C13 0.030(4) 0.039(5) 0.026(4) -0.003(4) 0.005(3) 0.003(4)
C14 0.049(6) 0.039(5) 0.040(5) 0.015(4) 0.006(4) 0.005(5)
C15 0.050(6) 0.068(7) 0.027(4) -0.013(5) 0.012(4) -0.005(6)
C16 0.048(5) 0.055(6) 0.023(4) -0.013(4) 0.015(4) -0.003(5)
C17 0.045(5) 0.028(4) 0.038(5) -0.005(4) 0.008(4) 0.001(4)
C18 0.025(4) 0.032(4) 0.030(4) -0.004(4) -0.001(3) 0.005(4)
C19 0.075(6) 0.092(7) 0.067(6) -0.004(5) 0.019(5) -0.009(6)
C20 0.075(6) 0.092(7) 0.067(6) -0.004(5) 0.019(5) -0.009(6)
N1 0.032(4) 0.016(3) 0.029(3) -0.008(3) 0.006(3) 0.004(3)
N2 0.032(4) 0.026(3) 0.028(3) -0.002(3) 0.000(3) 0.005(3)
N3 0.042(4) 0.018(3) 0.014(3) 0.000(2) -0.005(3) 0.005(3)
N4 0.029(4) 0.028(4) 0.036(4) 0.001(3) 0.009(3) 0.004(3)
N5 0.036(4) 0.022(3) 0.020(3) 0.002(3) 0.006(3) 0.001(3)
O1 0.045(4) 0.038(3) 0.035(3) -0.005(3) -0.003(3) 0.019(3)
O2 0.057(4) 0.030(3) 0.033(3) 0.003(3) 0.009(3) -0.001(3)
Cl1 0.0435(12) 0.0174(9) 0.0324(10) -0.0023(7) 0.0044(9) 0.0019(8)
Ni1 0.0312(6) 0.0163(5) 0.0192(5) -0.0015(4) 0.0001(4) 0.0028(4)
Cl2 0.0574(15) 0.0528(14) 0.0271(10) 0.0072(10) -0.0067(10) -0.0069(13)
 
_geom_special_details
;
 All esds (except the esd in the dihedral angle between two l.s. planes)
 are estimated using the full covariance matrix.  The cell esds are taken
 into account individually in the estimation of esds in distances, angles
 and torsion angles; correlations between esds in cell parameters are only
 used when they are defined by crystal symmetry.  An approximate (isotropic)
 treatment of cell esds is used for estimating esds involving l.s. planes.
;
 
loop_
 _geom_bond_atom_site_label_1
 _geom_bond_atom_site_label_2
 _geom_bond_distance
 _geom_bond_site_symmetry_2
 _geom_bond_publ_flag
C1 C6 1.380(12) . ?
C1 C2 1.390(12) . ?
C1 N1 1.396(10) . ?
C2 C3 1.365(14) . ?
C2 H2 0.9500 . ?
C3 C4 1.386(14) . ?
C3 H3 0.9500 . ?
C4 C5 1.376(13) . ?
C4 H4 0.9500 . ?
C5 C6 1.397(12) . ?
C5 H5 0.9500 . ?
C6 N2 1.405(11) . ?
C7 N2 1.444(11) . ?
C7 H7A 0.9800 . ?
C7 H7B 0.9800 . ?
C7 H7C 0.9800 . ?
C8 N1 1.312(10) . ?
C8 N2 1.366(11) . ?
C8 C9 1.484(11) . ?
C9 N3 1.442(12) . ?
C9 H9A 0.9900 . ?
C9 H9B 0.9900 . ?
C10 C11 1.482(11) . ?
C10 N3 1.487(11) . ?
C10 H10A 0.9900 . ?
C10 H10B 0.9900 . ?
C11 N5 1.341(11) . ?
C11 N4 1.346(11) . ?
C12 N4 1.457(11) . ?
C12 H12A 0.9800 . ?
C12 H12B 0.9800 . ?
C12 H12C 0.9800 . ?
C13 C18 1.372(13) . ?
C13 N4 1.393(11) . ?
C13 C14 1.400(13) . ?
C14 C15 1.380(14) . ?
C14 H14 0.9500 . ?
C15 C16 1.420(15) . ?
C15 H15 0.9500 . ?
C16 C17 1.336(13) . ?
C16 H16 0.9500 . ?
C17 C18 1.423(12) . ?
C17 H17 0.9500 . ?
C18 N5 1.379(10) . ?
C19 O1 1.449(16) . ?
C19 H19A 0.9800 . ?
C19 H19B 0.9800 . ?
C19 H19C 0.9800 . ?
C20 O2 1.390(16) . ?
C20 H20A 0.9800 . ?
C20 H20B 0.9800 . ?
C20 H20C 0.9800 . ?
N1 Ni1 2.056(7) . ?
N3 Ni1 2.189(6) . ?
N3 H3' 0.9300 . ?
N5 Ni1 2.068(7) . ?
O1 Ni1 2.108(6) . ?
O1 H1' 0.9500 . ?
O2 Ni1 2.095(6) . ?
O2 H2' 0.9500 . ?
Cl1 Ni1 2.367(2) . ?
 
loop_
 _geom_angle_atom_site_label_1
 _geom_angle_atom_site_label_2
 _geom_angle_atom_site_label_3
 _geom_angle
 _geom_angle_site_symmetry_1
 _geom_angle_site_symmetry_3
 _geom_angle_publ_flag
C6 C1 C2 120.6(8) . . ?
C6 C1 N1 108.3(7) . . ?
C2 C1 N1 131.1(8) . . ?
C3 C2 C1 117.5(9) . . ?
C3 C2 H2 121.2 . . ?
C1 C2 H2 121.2 . . ?
C2 C3 C4 121.7(9) . . ?
C2 C3 H3 119.1 . . ?
C4 C3 H3 119.1 . . ?
C5 C4 C3 121.9(9) . . ?
C5 C4 H4 119.1 . . ?
C3 C4 H4 119.1 . . ?
C4 C5 C6 116.0(8) . . ?
C4 C5 H5 122.0 . . ?
C6 C5 H5 122.0 . . ?
C1 C6 C5 122.2(8) . . ?
C1 C6 N2 107.2(7) . . ?
C5 C6 N2 130.6(8) . . ?
N2 C7 H7A 109.5 . . ?
N2 C7 H7B 109.5 . . ?
H7A C7 H7B 109.5 . . ?
N2 C7 H7C 109.5 . . ?
H7A C7 H7C 109.5 . . ?
H7B C7 H7C 109.5 . . ?
N1 C8 N2 113.1(7) . . ?
N1 C8 C9 121.4(8) . . ?
N2 C8 C9 125.5(8) . . ?
N3 C9 C8 110.4(7) . . ?
N3 C9 H9A 109.6 . . ?
C8 C9 H9A 109.6 . . ?
N3 C9 H9B 109.6 . . ?
C8 C9 H9B 109.6 . . ?
H9A C9 H9B 108.1 . . ?
C11 C10 N3 110.4(7) . . ?
C11 C10 H10A 109.6 . . ?
N3 C10 H10A 109.6 . . ?
C11 C10 H10B 109.6 . . ?
N3 C10 H10B 109.6 . . ?
H10A C10 H10B 108.1 . . ?
N5 C11 N4 111.2(7) . . ?
N5 C11 C10 122.1(7) . . ?
N4 C11 C10 126.7(8) . . ?
N4 C12 H12A 109.5 . . ?
N4 C12 H12B 109.5 . . ?
H12A C12 H12B 109.5 . . ?
N4 C12 H12C 109.5 . . ?
H12A C12 H12C 109.5 . . ?
H12B C12 H12C 109.5 . . ?
C18 C13 N4 106.0(7) . . ?
C18 C13 C14 124.0(8) . . ?
N4 C13 C14 130.0(9) . . ?
C15 C14 C13 114.1(9) . . ?
C15 C14 H14 122.9 . . ?
C13 C14 H14 122.9 . . ?
C14 C15 C16 123.0(8) . . ?
C14 C15 H15 118.5 . . ?
C16 C15 H15 118.5 . . ?
C17 C16 C15 121.1(9) . . ?
C17 C16 H16 119.4 . . ?
C15 C16 H16 119.4 . . ?
C16 C17 C18 117.9(9) . . ?
C16 C17 H17 121.1 . . ?
C18 C17 H17 121.1 . . ?
C13 C18 N5 109.6(7) . . ?
C13 C18 C17 119.7(8) . . ?
N5 C18 C17 130.7(8) . . ?
O1 C19 H19A 109.5 . . ?
O1 C19 H19B 109.5 . . ?
H19A C19 H19B 109.5 . . ?
O1 C19 H19C 109.5 . . ?
H19A C19 H19C 109.5 . . ?
H19B C19 H19C 109.5 . . ?
O2 C20 H20A 109.5 . . ?
O2 C20 H20B 109.5 . . ?
H20A C20 H20B 109.5 . . ?
O2 C20 H20C 109.5 . . ?
H20A C20 H20C 109.5 . . ?
H20B C20 H20C 109.5 . . ?
C8 N1 C1 106.3(7) . . ?
C8 N1 Ni1 113.9(6) . . ?
C1 N1 Ni1 139.4(5) . . ?
C8 N2 C6 105.0(7) . . ?
C8 N2 C7 126.6(8) . . ?
C6 N2 C7 128.3(7) . . ?
C9 N3 C10 113.3(6) . . ?
C9 N3 Ni1 109.1(5) . . ?
C10 N3 Ni1 109.1(5) . . ?
C9 N3 H3' 108.4 . . ?
C10 N3 H3' 108.4 . . ?
Ni1 N3 H3' 108.4 . . ?
C11 N4 C13 107.3(7) . . ?
C11 N4 C12 125.8(7) . . ?
C13 N4 C12 126.7(7) . . ?
C11 N5 C18 105.9(7) . . ?
C11 N5 Ni1 113.4(5) . . ?
C18 N5 Ni1 140.2(6) . . ?
C19 O1 Ni1 126.9(7) . . ?
C19 O1 H1' 116.6 . . ?
Ni1 O1 H1' 116.6 . . ?
C20 O2 Ni1 121.7(7) . . ?
C20 O2 H2' 119.2 . . ?
Ni1 O2 H2' 119.2 . . ?
N1 Ni1 N5 90.4(3) . . ?
N1 Ni1 O2 91.3(3) . . ?
N5 Ni1 O2 169.6(3) . . ?
N1 Ni1 O1 169.1(2) . . ?
N5 Ni1 O1 91.6(3) . . ?
O2 Ni1 O1 84.9(3) . . ?
N1 Ni1 N3 79.8(3) . . ?
N5 Ni1 N3 80.8(3) . . ?
O2 Ni1 N3 89.4(2) . . ?
O1 Ni1 N3 89.9(3) . . ?
N1 Ni1 Cl1 99.84(18) . . ?
N5 Ni1 Cl1 98.44(19) . . ?
O2 Ni1 Cl1 91.38(18) . . ?
O1 Ni1 Cl1 90.42(18) . . ?
N3 Ni1 Cl1 179.12(16) . . ?
 
_diffrn_measured_fraction_theta_max    0.991
_diffrn_reflns_theta_full              25.02
_diffrn_measured_fraction_theta_full   0.991
_refine_diff_density_max    0.790
_refine_diff_density_min   -1.681
_refine_diff_density_rms    0.169
